# Supplementary material for: Ag-coated tetrapod gold nanostars (Au@AgNSs) for acetamiprid determination in tea using SERS combined with microfluidics
Source: Royal Society of Chemistry journal article supplement (doi:10.1039/d4ay00297k), 2024-01-01
Supplement: d4ay00297k1.pdf [file d4ay00297k1.pdf]

## Supplementary Material

### **Ag-coated tetrapod gold nanostars (Au@AgNSs) for acetamiprid determination in tea using SERS combined with microfluidics**

Qian Ke<sup>a</sup>, Limei Yin<sup>a, b</sup>, Heera Jayan<sup>a</sup>, Hesham R. El-Seedi<sup>c, d</sup>, Xiaobo Zou<sup>a, d</sup>, Zhiming Guo<sup>a, b</sup>\*

<sup>a</sup> *China Light Industry Key Laboratory of Food Intelligent Detection & Processing, School of Food and Biological Engineering, Jiangsu University, Zhenjiang 212013, China*

<sup>b</sup> *International Joint Research Laboratory of Intelligent Agriculture and Agri-products Processing, Jiangsu University, Zhenjiang 212013, China*

<sup>c</sup> *Pharmacognosy Group, Department of Pharmaceutical Biosciences, BMC, Uppsala University, Box 591, SE 751 24 Uppsala, Sweden*

<sup>d</sup> *International Research Center for Food Nutrition and Safety, Jiangsu University, Zhenjiang 212013, China*

*\*Corresponding author at: School of Food and Biological Engineering, Jiangsu University, Zhenjiang 212013, China*

*Email address: guozhiming@ujs.edu.cn (Z.M. Guo)*

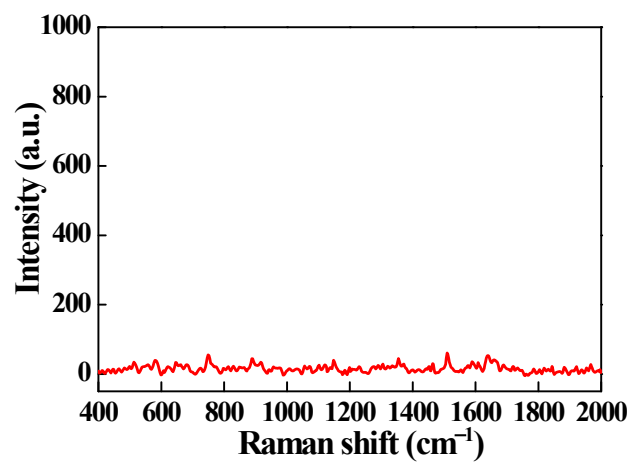

**Figure S1.** The Raman spectrum of Au@AgNSs in the microfluidic channel

The content of acetamiprid in the sample was calculated according to Formula (1)

$$X = \frac{\rho \times V}{m} \quad (1)$$

X the content of acetamiprid in the sample (mg/kg);

$\rho$  the concentration of acetamiprid in the sample solution calculated from the standard curve (mg/mL);

V final volume (mL)

m sample weight (kg)
